# Supplementary material
Source: publisher site journal article supplement (https://www.dovepress.com/article/312347)
Supplement: Supplementary file 1 [file get_supplementary_file.php]

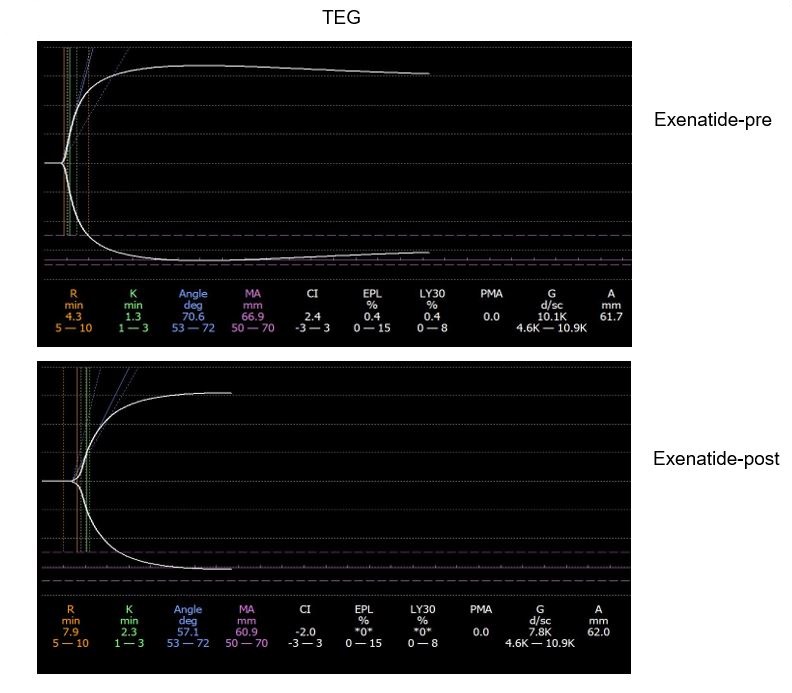


**Figure S1 Changes of TEG in T2DM patients before and after exenatide treatment**

Note: The results showed that the blood of T2DM patients was in a hypercoagulable state before exenatide treatment, and the K value was prolonged (1.3 min *vs.* 2.3 min), the α angle was reduced (70.6 deg *vs.* 57.1 deg) and the MA (maximum amplitude) value was decreased (66.9 min *vs.* 60.9 min) after exenatide treatment, *p*<0.05, respectively.

TEG: thromboelastogram, R: reaction time, K: kinetics time, Angle: kinetics of clot development, MA: maximum amplitude, maximum strength of clot, LY30: percent lysis 30 min after MA.

**TableS1 Comparison of coagulation and platelet aggregation in different therapeutic doses (%,**‾x **± s)**

| Variables | Exenatide therapeutic dose (sc, bid) | | *χ2//t* values | *P* values |
| --- | --- | --- | --- | --- |
| 5μg×4w →10μg×4w (n=25) | 5μg×4w→ 10μg×1w →5μg×3w (n=5) |
| Sex (male/female) | 19/6 | 4/1 | 0.036 | *NS* |
| Age (years) | 42.06±9.77 | 41.11±10.34 | 0.043 | *NS* |
| PLT (×1012 g/L) | 220.52±50.02 | 215.33±51.46 | 1.032 | *NS* |
| PT (s) | 12.29±1.54 | 10.95±1.47 | 0.056 | *NS* |
| PTA (%) | 105.22±14.22 | 107.33±16.12 | 0.066 | *NS* |
| INR | 1.30±1.20 | 1.29±1.22 | 0.030 | *NS* |
| APTT (s) | 30.25±24.30 | 33.81±23.56 | 1.059 | *NS* |
| FIB (g/L) | 2.90±0.42 | 3.08±0.58 | 0.082 | *NS* |
| TT (s) | 16.52±1.50 | 17.00±1.47 | 0.078 | *NS* |
| FDP (μg/mL) | 1.80±1.14 | 1.76±1.11 | 0.945 | *NS* |
| DD (μg/mL) | 0.28±0.30 | 0.31±0.28 | 1.720 | *NS* |
| NO（μmol/L） | 90.30±10.10 | 88.24±9.70 | 0.184 | *NS* |
| CD62p (%) | 10.20±3.75 | 11.36±3.66 | 1.020 | *NS* |
| PAC-1 (%) | 19.40±1.87 | 18.96±2.08 | 0.047 | *NS* |
| EPI induction (%) | 60.15±5.37 | 62.76±6.01 | 1.008 | *NS* |
| COLL induction (%) | 58.30±5.10 | 61.22±5.34 | 1.733 | *NS* |
| ADP induction (%) | 48.06±5.45 | 50.80±6.63 | 1.204 | *NS* |
| AA induction (%) | 51.74±4.03 | 48.87±5.20 | 1.586 | *NS* |

Notes: NO: nitric oxide, PLT: platelets, PT: prothrombin time, PTA: prothrombin time activity, INR: international normalized ratio, APTT: activated partial thromboplastin time, FIB: fibrinogen, TT: thrombin time, FDP: fibrin degradation products, DD: D-dimer, PAC-1: platelet activation complex-1, EPI: epinephrine, COLL: collagen, ADP: adenosine diphosphate, AA: arachidonic acid, w: week, NS: no significant.
